# Supplementary material
Source: publisher site journal article supplement (https://www.dovepress.com/get_supplementary_file.php?f=166986.xlsx)
Supplement: Supplementary file 1 [file get_supplementary_file.php]

## Sheet: Suppl mat
Supplementary File : full results (drug-sensitivity testing performed by line probe assay or pyrosequencing: columns C to S, genotyping: columns T to X, predicitive drug-sensitivity testing using TB-RINT: columns Y to AA )		AID TB Resistance INH/RIF						Resistance FQ/EMB				Resistance SLID							Spoligotyping				Tbminer	Microbead-based resistance
Isolate ID	NTM	Valid	INH	RIF	katG	inhA	rpoB	FQ	EMB	gyrA	embB 306	KAN	AMK	CAP	STR	rrs	rpsL	rrs	Spoligotype	Lineage	SIT	Clade SITVITWEB	TB Lineage	rpoB	katG	inhA
P1052		Yes	R	R	wt Ø	wt	526 mut	S	R	wt	ATC	S	S	S	S	wt	wt	wt	nooooooooooooooonnnnnnooonnnnnnnoooonnnnnnn	L4.6.2/Cameroon/SIT852	852	CAM	Lineage_4_(Euro-American)	NR	NR	NR
P1055		Yes	S	S	wt	wt	wt	-	-	-	-	-	-	-	-	-	-	-	nnnnnnnnnnnnnnnnnnnnnnooonnnnnnnoooonnnnnnn	L4.6.2/Cameroon/SIT61	61	CAM	Lineage_4_(Euro-American)	WT	WT	WT
P1067		Yes	S	S	wt	wt	wt	-	-	-	-	-	-	-	-	-	-	-	nnnnnnnnnnnnnnnnnnnnnnnnooooooonoooonnnonnn	L4/T2/SIT316	316	H3	Lineage_4_(Euro-American)	NR	WT	WT
P1072		Yes	S	S	wt	wt	wt	-	-	-	-	-	-	-	-	-	-	-	nnnnnnnnnnnnnnnnnnnnnnooonnnnnnnoooonnnnnnn	L4.6.2/Cameroon/SIT61	61	CAM	Lineage_4_(Euro-American)	WT	WT	WT
P1080		Yes	S	S	wt	wt	wt	-	-	-	-	-	-	-	-	-	-	-	nnnnnnnnnnnnnnnnnnnnnnooonnnnnnnoooonnnnnnn	L4.6.2/Cameroon/SIT61	61	CAM	Lineage_4_(Euro-American)	WT	WT	WT
P1081		Yes	S	S	wt	wt	wt	-	-	-	-	-	-	-	-	-	-	-	nnnnnnnnnnnnnnnnnnnnnnooonnnnnnnoooonnnnnnn	L4.6.2/Cameroon/SIT61	61	CAM	Lineage_4_(Euro-American)	NR	NR	NR
P1094		Yes	S	S	wt	wt	wt	-	-	-	-	-	-	-	-	-	-	-	nnnnnnnnnnnnnnnnnnnnnnooonnnnnnnoooonnnnnnn	L4.6.2/Cameroon/SIT61	61	CAM	Lineage_4_(Euro-American)	WT	WT	WT
P1095		Yes	S	S	wt	wt	wt	-	-	-	-	-	-	-	-	-	-	-	nnnnnnooonnnnnnnnnnnnooonnnnnnnnnnnnnnonnnn	L6/afri/WA2/SIT326	326	AFRI_1	Lineage_6_(West_African_2_-_Afri1)	WT	WT	WT
P030		Yes	S	S	wt	wt	wt	-	-	-	-	-	-	-	-	-	-	-	nnnnnnnnnnnnnnnnnnnnnnooonnnnnnnoooonnnnnnn	L4.6.2/Cameroon/SIT61	61	CAM	Lineage_4_(Euro-American)	WT	WT	WT
P062		Yes	S	S	wt	wt	wt	-	-	-	-	-	-	-	-	-	-	-	nnnnnnnnnnnnnnnnnnnnnnooonnnnnnnoooonnnnnnn	L4.6.2/Cameroon/SIT61	61	CAM	Lineage_4_(Euro-American)	NR	NR	NR
P089		Yes	S	S	wt	wt	wt	-	-	-	-	-	-	-	-	-	-	-	NR		-	-	-	WT	WT	WT
P090 NTM	M. fortuitum - M. peregrinum complex	-	-	-	-	-	-	-	-	-	-	-	-	-	-	-	-	-	NR		-	-	-	NR	NR	NR
P100		Yes	S	S	wt	wt	wt	-	-	-	-	-	-	-	-	-	-	-	nnnnnnnnnnnnnnnnnnnnnnooonnnnnnnoooonnnnnnn	L4.6.2/Cameroon/SIT61	61	CAM	Lineage_4_(Euro-American)	WT	WT	WT
P124		Yes	S	S	wt	wt	wt	-	-	-	-	-	-	-	-	-	-	-	nnnnnnnnnnnnnnnnnnnnnnoooooonnnnoooonnnnnnn	L4/T1/orphan	ORPHAN	T1	Lineage_4_(Euro-American)	WT	WT	WT
P136		Yes	S	S	wt	wt	wt	-	-	-	-	-	-	-	-	-	-	-	nnnnnnnnnnnnnnnnnnnnnnooonnnnnnnoooonnnnnnn	L4.6.2/Cameroon/SIT61	61	CAM	Lineage_4_(Euro-American)	NR	NR	NR
P141		Yes	S	S	wt	wt	wt	-	-	-	-	-	-	-	-	-	-	-	nnnnnnnnnnnnnnnnnnnnnnooonnnnnnnoooonnnnnnn	L4.6.2/Cameroon/SIT61	61	CAM	Lineage_4_(Euro-American)	WT	WT	WT
P143		Yes	S	S	wt	wt	wt	-	-	-	-	-	-	-	-	-	-	-	nnnnnnnnnnnnnnnnnnnnnnooonnnnnnnoooonnnnnnn	L4.6.2/Cameroon/SIT61	61	CAM	Lineage_4_(Euro-American)	WT	WT	WT
P149		Yes	S	S	wt	wt	wt	-	-	-	-	-	-	-	-	-	-	-	nnnnnnnnnnnnnnnnnnnnnnooonnnnnnnoooonnnnnnn	L4.6.2/Cameroon/SIT61	61	CAM	Lineage_4_(Euro-American)	WT	WT	WT
P163		Yes	S	S	wt	wt	wt	-	-	-	-	-	-	-	-	-	-	-	noonnnnnnnnnnnnnnnnnnnooonnnnnnnoooonnnnnnn	L4.6.2/Cameroon/orphan	ORPHAN	CAM	Lineage_4_(Euro-American)	NR	NR	NR
P167		Yes	S	S	wt	wt	wt	-	-	-	-	-	-	-	-	-	-	-	nnnnnnnnnnnnnnnnnnnnnnooonnnnnnnoooonnnnnnn	L4.6.2/Cameroon/SIT61	61	CAM	Lineage_4_(Euro-American)	NR	NR	NR
P169		Yes	S	S	wt	wt	wt	-	-	-	-	-	-	-	-	-	-	-	nnnnnnnnnnnnnnnnnnnnnnooonnnnnnnoooonnnnnnn	L4.6.2/Cameroon/SIT61	61	CAM	Lineage_4_(Euro-American)	WT	WT	WT
P177 NTM	MTBC	No MTBC	R	S	wt	wt Ø	wt	S	S	wt	wt	S	S	S	S	wt	wt	wt	nnnnnnnnnnnnnnnnnnnnnnnnooooooonoooonnnonnn	L4/T2/SIT316	316	H3	Lineage_4_(Euro-American)	NR	NR	NR
P186		Yes	S	S	wt	wt	wt	-	-	-	-	-	-	-	-	-	-	-	nnnnnnnnnnnnnnnnnnnnnnooonnnnnnnoooonnnnnnn	L4.6.2/Cameroon/SIT61	61	CAM	Lineage_4_(Euro-American)	NR	NR	NR
P203		Yes	R	S	wt	mut	wt	S	S	wt	wt	S	S	S	S	wt	wt	wt	nnnnnnnnnnnnnnnnnnnnnnooonnnnnnnoooonnnnnnn	L4.6.2/Cameroon/SIT61	61	CAM	Lineage_4_(Euro-American)	WT	WT	(-15)T
P206		Yes	S	S	wt	wt	wt	-	-	-	-	-	-	-	-	-	-	-	nnnnnnnnnnnnnnnnnnnnnnooonnnnnnnoooonnnnnnn	L4.6.2/Cameroon/SIT61	61	CAM	Lineage_4_(Euro-American)	NR	NR	NR
P250		Yes	S	S	wt	wt	wt	-	-	-	-	-	-	-	-	-	-	-	nnnnnnnnnnnnnnnnnnnnnnooonnnnnnnoooonnnnnnn	L4.6.2/Cameroon/SIT61	61	CAM	Lineage_4_(Euro-American)	NR	NR	NR
P287		Yes	R	S	wt	mut	wt	S	S	wt	wt	S	S	S	S	wt	wt	wt	nnnnnnnnnnnnnnnnnnnnnnooonnnnnnnoooonnnnnnn	L4.6.2/Cameroon/SIT61	61	CAM	Lineage_4_(Euro-American)	WT	WT	(-15)T
P304 NTM	M.intracellulare (sequevars Min-A, -B, -C and -D)	-	-	-	-	-	-	-	-	-	-	-	-	-	-	-	-	-	NR		-	-	-	NR	NR	NR
P322		Yes	S	S	wt	wt	wt	-	-	-	-	-	-	-	-	-	-	-	nnnnnnnnnnnnnnnnnnnnnnooonnnnnnnoooonnnnnnn	L4.6.2/Cameroon/SIT61	61	CAM	Lineage_4_(Euro-American)	WT	WT	WT
P345		Yes	S	S	wt	wt	wt	-	-	-	-	-	-	-	-	-	-	-	nnnonnnnnnnnnnnnnnnnnnnnnnnnnnnnoooonnnonnn	L4/T2/SIT848	848	T2	Lineage_4_(Euro-American)	WT	WT	WT
P351		Yes	S	S	wt	wt	wt	-	-	-	-	-	-	-	-	-	-	-	nnnnnnnnnnnnnnnnnnnnnonnnnnnnnnnoooonnnonnn	L4/T2/SIT2088	2088	T2	Lineage_4_(Euro-American)	NR	NR	NR
P355		Yes	R	S	wt	wt Ø	wt	S	S	wt	wt	S	S	S	S	wt	wt	wt	NR		-	-	-	NR	NR	NR
P356		Yes	S	S	wt	wt	wt	-	-	-	-	-	-	-	-	-	-	-	nnnnnnnnnnnnnnnnnnnnnnooonnnnnnnoooonnnnnnn	L4.6.2/Cameroon/SIT61	61	CAM	Lineage_4_(Euro-American)	NR	NR	NR
P359		Yes	S	S	wt	wt	wt	-	-	-	-	-	-	-	-	-	-	-	nnnnnnnnnnnnnnnnnnnnnonnnnnnnnnnoooonnnonnn	L4/T2/SIT2088	2088	T2	Lineage_4_(Euro-American)	WT	WT	WT
P366		Yes	S	S	wt	wt	wt	-	-	-	-	-	-	-	-	-	-	-	nnnnnnnnnnnnnnnnnnnnnonnnnnnnnnnoooonnnonnn	L4/T2/SIT2088	2088	T2	Lineage_4_(Euro-American)	WT	WT	WT
P369		Yes	S	S	wt	wt	wt	-	-	-	-	-	-	-	-	-	-	-	nnnnnnnnnnnnnnnnnnnnnnooonnnnnnnoooonnnnnnn	L4.6.2/Cameroon/SIT61	61	CAM	Lineage_4_(Euro-American)	NR	NR	NR
P381		Yes	S	S	wt	wt	wt	-	-	-	-	-	-	-	-	-	-	-	nnnnnnnnnnnnnnnnnnnnnnooonnnnnnnoooonnnnnnn	L4.6.2/Cameroon/SIT61	61	CAM	Lineage_4_(Euro-American)	NR	NR	NR
P385		Yes	S	S	wt	wt	wt	-	-	-	-	-	-	-	-	-	-	-	nnnnnnnnnnnnnnnnnnnnnonnnnnnnnnnoooonnnonnn	L4/T2/SIT2088	2088	T2	Lineage_4_(Euro-American)	WT	WT	WT
P399		Yes	S	S	wt	wt	wt	-	-	-	-	-	-	-	-	-	-	-	nnnnnnnnnnnnnnnnnnnnnnooonnnnnnnoooonnnnnnn	L4.6.2/Cameroon/SIT61	61	CAM	Lineage_4_(Euro-American)	WT	WT	WT
P407 NTM	MTBC	Yes	S	S	wt	wt	wt	-	-	-	-	-	-	-	-	-	-	-	nnnnnnnooooonnnnnnnnoooonnnnnnnnnnnnooonnnn	L5/afri/WA1/SIT331	331	AFRI_2	Lineage_5_(West_African_1_-_Afri2)	WT	WT	WT
P424		Yes	S	R	wt	wt	531 mut	R	R	mut A90V	ATC	S	S	S	R	wt	wt	mut A523C	ND		-	-	-	ND	ND	ND
P452		Yes	S	S	wt	wt	wt	-	-	-	-	-	-	-	-	-	-	-	nnnnnnnooooonnnnnnnnoooonnnnnnnnnnnnooonnnn	L5/afri/WA1/SIT331	331	AFRI_2	Lineage_5_(West_African_1_-_Afri2)	WT	WT	WT
P466		Yes	S	S	wt	wt	wt	-	-	-	-	-	-	-	-	-	-	-	nnnnnnnnnnnnnnnnnnnnnnooonnnnnnnoooonnnnnnn	L4.6.2/Cameroon/SIT61	61	CAM	Lineage_4_(Euro-American)	WT	WT	WT
P471		Yes	S	S	wt	wt	wt	-	-	-	-	-	-	-	-	-	-	-	nnnnnnnnnnnnnnnnnnnnnnnnoooooonnoooonnnonnn	L4/SIT233	233	T2	Lineage_4_(Euro-American)	WT	WT	WT
P473		Yes	S	S	wt	wt	wt	-	-	-	-	-	-	-	-	-	-	-	nnnnnnnooooonnnnnnnnoooonnnnnnnnnnnnooonnnn	L5/afri/WA1/SIT331	331	AFRI_2	Lineage_5_(West_African_1_-_Afri2)	WT	WT	WT
P475		Yes	S	S	wt	wt	wt	-	-	-	-	-	-	-	-	-	-	-	nnnnnnnooooonnnnnnnnoooonnnonnnnnnnnooonnnn	L5/afri/WA1/new	new	-	Lineage_5_(West_African_1_-_Afri2)	WT	WT	WT
P493		Yes	S	S	wt	wt	wt	-	-	-	-	-	-	-	-	-	-	-	nnnnnnnnnnnnnnnnnnnnnnooonnnnnnnoooonnnnnnn	L4.6.2/Cameroon/SIT61	61	CAM	Lineage_4_(Euro-American)	WT	WT	WT
P496		Yes	S	S	wt	wt	wt	-	-	-	-	-	-	-	-	-	-	-	nnnnnnnnnnnnnnnoooonnnooonnnnnnnoooonnnnnnn	L4.6.2/Cameroon/orphan	ORPHAN	CAM	Lineage_4_(Euro-American)	NR	NR	NR
P500		Yes	S	S	wt	wt	wt	-	-	-	-	-	-	-	-	-	-	-	noonnnnnnnnnnnnnnnnnnnnnnoooooonoooonnnnnnn	L4.1.2/Haarlem/SIT1652	1652	H1	Lineage_4_(Euro-American)	NR	NR	NR
P512		Yes	S	S	wt	wt	wt	-	-	-	-	-	-	-	-	-	-	-	nnnooooooooonnnnnonnnnnnnnnnnnnnoooonnnoooo	L4.1.1/X/SIT200	200	X3	Lineage_4_(Euro-American)	WT	WT	WT
P522		Yes	S	S	wt	wt	wt	-	-	-	-	-	-	-	-	-	-	-	nnnnnnnnnnnnnnnnnnnnnnooonnnnnnnoooonnnnnnn	L4.6.2/Cameroon/SIT61	61	CAM	Lineage_4_(Euro-American)	NR	NR	NR
P610		Yes	S	S	wt	wt	wt	-	-	-	-	-	-	-	-	-	-	-	nnnnnnnnnnnnnnnnnnnnnnooonnnnnnnoooonnnnnnn	L4.6.2/Cameroon/SIT61	61	CAM	Lineage_4_(Euro-American)	NR	NR	NR
P614 NTM	MTBC	Yes	S	R	wt	wt	526 mut	S	S	wt	wt	S	S	S	S	wt	wt	wt	nnnnnnnnnnnnnnnnnnnnnnoooooonnnnoooonnnnnnn	L4/T1/orphan	ORPHAN	T1	Lineage_4_(Euro-American)	NR	NR	NR
P619		Yes	S	S	wt	wt	wt	-	-	-	-	-	-	-	-	-	-	-	nnnnnnnnnnnnnnnnnnnnnnooonnnnnnnoooonnnnnnn	L4.6.2/Cameroon/SIT61	61	CAM	Lineage_4_(Euro-American)	NR	NR	NR
P624		Yes	S	S	wt	wt	wt	-	-	-	-	-	-	-	-	-	-	-	nnnnnnnnnnnnnnnnnnnnnnooonnnnnnnoooonnnoooo	L4/new	new	-	Lineage_4_(Euro-American)	WT	WT	WT
P651		Yes	S	S	wt	wt	wt	-	-	-	-	-	-	-	-	-	-	-	nnnnonnnnnnnnnnnnnnnnnooonnnnnnnoooonnnnnnn	L4/new	new	-	Lineage_4_(Euro-American)	WT	WT	WT
P653		Yes	S	S	wt	wt	wt	-	-	-	-	-	-	-	-	-	-	-	nnnnnnnnnnnnnnnoooonnnooonnnnnnnoooonnnnnnn	L4.6.2/Cameroon/orphan	ORPHAN	CAM	Lineage_4_(Euro-American)	NR	NR	NR
P665		Yes	S	S	wt	wt	wt	-	-	-	-	-	-	-	-	-	-	-	noonnnnnnnnnnnnnnnnnnnnnnnnnnnnnoooonnnnnnn	L4/T1/SIT804	804	T1	Lineage_4_(Euro-American)	WT	WT	WT
P666		Yes	S	R	wt	wt	526 mut	S	S	wt	wt	S	S	S	S	wt	wt	wt	ND		-	-	-	ND	ND	ND
P672	M.avium, M.paratuberculosis, M.silvaticum	No	NR	NR	NR	NR	NR	-	-	-	-	-	-	-	-	-	-	-	NR		-	-	-	NR	NR	NR
P673		Yes	S	S	wt	wt	wt	-	-	-	-	-	-	-	-	-	-	-	nnnnnnnnoonnnnnnnnnnnooooooooooooooooooooon	L4/orphan	ORPHAN	-	Lineage_4_(Euro-American)	WT	WT	WT
P695		Yes	S	S	wt	wt	wt	-	-	-	-	-	-	-	-	-	-	-	nnnnnnnnnnnnnnnnnnnnnnooonnnnnnnoooonnnnnnn	L4.6.2/Cameroon/SIT61	61	CAM	Lineage_4_(Euro-American)	WT	WT	WT
P720		Yes	S	S	wt	wt	wt	-	-	-	-	-	-	-	-	-	-	-	nnnnnnnnnnnnnnnnnnnnnnooonnnnnnnoooonnnnnnn	L4.6.2/Cameroon/SIT61	61	CAM	Lineage_4_(Euro-American)	WT	WT	WT
P733		Yes	S	S	wt	wt	wt	-	-	-	-	-	-	-	-	-	-	-	nnnnnnnnnnnnnnnnnnnnnnooonnnnnnnoooonnnnnnn	L4.6.2/Cameroon/SIT61	61	CAM	Lineage_4_(Euro-American)	WT	WT	WT
P754		Yes	S	S	wt	wt	wt	-	-	-	-	-	-	-	-	-	-	-	nnnnnnnnnnnnnnnnnnnnnnooonnnnnnnoooonnnnnnn	L4.6.2/Cameroon/SIT61	61	CAM	Lineage_4_(Euro-American)	NR	NR	NR
P757		Yes	S	S	wt	wt	wt	-	-	-	-	-	-	-	-	-	-	-	nnnnnnnnnnnnnnnnnnnnnnooonnnnnnnoooonnnnnnn	L4.6.2/Cameroon/SIT61	61	CAM	Lineage_4_(Euro-American)	NR	NR	NR
P768		Yes	S	S	wt	wt	wt	-	-	-	-	-	-	-	-	-	-	-	nnnnnnnnnnnnnnnnnnnnnnooonnnnnnnoooonnnnnnn	L4.6.2/Cameroon/SIT61	61	CAM	Lineage_4_(Euro-American)	WT	WT	WT
P769		Yes	S	S	wt	wt	wt	-	-	-	-	-	-	-	-	-	-	-	nnnnnnnnnnnnnnnnnnnnnnooonnnnnnnoooonnnnnnn	L4.6.2/Cameroon/SIT61	61	CAM	Lineage_4_(Euro-American)	WT	WT	WT
P770		Yes	S	S	wt	wt	wt	-	-	-	-	-	-	-	-	-	-	-	nnnnnnnnnnnnnnnnnnnnnnooonnnnnnnoooonnnnnnn	L4.6.2/Cameroon/SIT61	61	CAM	Lineage_4_(Euro-American)	NR	NR	NR
P778		Yes	S	S	wt	wt	wt	-	-	-	-	-	-	-	-	-	-	-	nnnnnnnnnnnnnnnnnnnnnnooonnnnnnnoooonnnnnnn	L4.6.2/Cameroon/SIT61	61	CAM	Lineage_4_(Euro-American)	NR	NR	NR
P780		Yes	S	R	wt	wt	526 mut	S	S	wt	wt	S	S	S	S	wt	wt	wt	ND		-	-	-	ND	ND	ND
P783		Yes	S	S	wt	wt	wt	-	-	-	-	-	-	-	-	-	-	-	nnnnnnnnnnnnnnnnnnnnnnooonnnnnnnoooonnnnnnn	L4.6.2/Cameroon/SIT61	61	CAM	Lineage_4_(Euro-American)	WT	WT	WT
P790		Yes	R	S	wt	mut	wt	S	S	wt	wt	S	S	S	S	wt	wt	wt	nnnnnnnnnnnnnnnnnnnnnnnnnnnnnnnnoooonnnnnnn	L4/T1/SIT53	53	T1	Lineage_4_(Euro-American)	WT	WT	(-15)T
P711		Yes	S	S	wt	wt	wt	-	-	-	-	-	-	-	-	-	-	-	ND		-	-	-	ND	ND	ND
P1005	M.intracellulare (sequevars Min-A, -B, -C and -D)	No	NR	NR	NR	NR	NR	-	-	-	-	-	-	-	-	-	-	-	nnnnnnoooooooooonnnnoooonnnnnnnnnnnnooonnnn	L5/afri/WA1/orphan	ORPHAN	AFRI	Lineage_5_(West_African_1_-_Afri2)	NR	NR	NR
P1019		Yes	S	S	wt	wt	wt	-	-	-	-	-	-	-	-	-	-	-	noonnnnnnnnnnnnnoonnnnnnnnnnnonnoooonnnonnn	L4/new	new	-	Lineage_4_(Euro-American)	NR	NR	NR
P1024		Yes	R	R	mut	wt	531mut	S	S	wt	wt	S	S	S	ND	wt	ND	ND	nooooooooooooooonnnnnnooonnnnnnnoooonnnnnnn	L4.6.2/Cameroon/SIT852	852	CAM	Lineage_4_(Euro-American)	531TTG	315C	WT
P1030		Yes	S	S	wt	wt	wt	-	-	-	-	-	-	-	-	-	-	-	nnnnnnnnnnnnnnnnnnnnnnnnnooooonnoooonnnnnnn	L4/SIT1872	1872	T1	Lineage_4_(Euro-American)	WT	WT	WT
P1042		Yes	R	R	mut	wt	531mut	S	S	wt	wt	S	S	S	ND	wt	ND	ND	ND		-	-	-	ND	ND	ND
P1054		Yes	S	S	wt	wt	wt	-	-	-	-	-	-	-	-	-	-	-	nnnnnnnnnnnnnnnnnnnnnnooonnnnnnnoooonnnnnnn	L4.6.2/Cameroon/SIT61	61	CAM	Lineage_4_(Euro-American)	WT	WT	WT
P1062		Yes	S	S	wt	wt	wt	-	-	-	-	-	-	-	-	-	-	-	nnnnnnnnnnnnnnnnnnnnnnooonnnnnnnoooonnnnnnn	L4.6.2/Cameroon/SIT61	61	CAM	Lineage_4_(Euro-American)	WT	NR	NR
P1063		Yes	S	S	wt	wt	wt	-	-	-	-	-	-	-	-	-	-	-	nnnnnnnnnnnnnnnnnnnnnnooonnnnnnnoooonnnonnn	L4.6.2/Cameroon/SIT403	403	CAM	Lineage_4_(Euro-American)	WT	WT	WT
P1067		Yes	S	S	wt	wt	wt	-	-	-	-	-	-	-	-	-	-	-	nnnnnnnnnnnnnnnnnnnnnnnnooooooonoooonnnonnn	L4/T2/SIT316	316	H3	Lineage_4_(Euro-American)	NR	WT	WT
P1068	Myc genus	No	NR	NR	NR	NR	NR	-	-	-	-	-	-	-	-	-	-	-	NR		-	-	-	NR	NR	NR
P1071	NR	No	NR	NR	NR	NR	NR	-	-	-	-	-	-	-	-	-	-	-	nnnnnnnnnnnnnnnnnnnnnnooonnnnnnnoooonnnnnnn	L4.6.2/Cameroon/SIT61	61	CAM	Lineage_4_(Euro-American)	NR	NR	NR
P1075		Yes	S	S	wt	wt	wt	-	-	-	-	-	-	-	-	-	-	-	nnnnnnnnnnnnnnnnnnnnnnnnnnnnnnonoooonnnonnn	L4.1.2/Haarlem/SIT49	49	H3	Lineage_4_(Euro-American)	NR	NR	NR
P1080		Yes	S	S	wt	wt	wt	-	-	-	-	-	-	-	-	-	-	-	nnnnnnnnnnnnnnnnnnnnnnooonnnnnnnoooonnnnnnn	L4.6.2/Cameroon/SIT61	61	CAM	Lineage_4_(Euro-American)	WT	WT	WT
P1092	Myc genus	No	NR	NR	NR	NR	NR	-	-	-	-	-	-	-	-	-	-	-	nnnnnnnnnnnnnnnnnnnnnnooonnnnnnnoooonnnnnnn	L4.6.2/Cameroon/SIT61	61	CAM	Lineage_4_(Euro-American)	NR	NR	NR
P1093		Yes	S	S	wt	wt	wt	-	-	-	-	-	-	-	-	-	-	-	ND		-	-	-	ND	ND	ND
P1094		Yes	S	S	wt	wt	wt	-	-	-	-	-	-	-	-	-	-	-	ND		-	-	-	ND	ND	ND
P1122	NR	No	NR	NR	NR	NR	NR	S	S	wt	wt	S	S	S	ND	wt	ND	ND	NR		-	-	-	NR	NR	NR
P1146		Yes	S	S	wt	wt	wt	-	-	-	-	-	-	-	-	-	-	-	nnnnnnnnnnnnnnnnnnnnnnooonnnnnnnoooonnnnnnn	L4.6.2/Cameroon/SIT61	61	CAM	Lineage_4_(Euro-American)	WT	WT	WT
P1151		Yes	S	S	wt	wt	wt	-	-	-	-	-	-	-	-	-	-	-	nnnnnnnnnnnnnnnnnnnnnnooonnnnnnnoooonnnnnnn	L4.6.2/Cameroon/SIT61	61	CAM	Lineage_4_(Euro-American)	WT	WT	WT
P1155	M.fortuitum - M.peregrinum complex	No	NR	NR	NR	NR	NR	-	-	-	-	-	-	-	-	-	-	-	NR		-	-	-	NR	NR	NR
P1173		Yes	S	S	wt	wt	wt	-	-	-	-	-	-	-	-	-	-	-	nnnnnnnnnnnnnnnnnnnnnnooonnnnnnnoooonnnnnnn	L4.6.2/Cameroon/SIT61	61	CAM	Lineage_4_(Euro-American)	WT	WT	WT
P1183	Myc genus	No	NR	NR	NR	NR	NR	-	-	-	-	-	-	-	-	-	-	-	ND		-	-	-	ND	ND	ND
P1203	M.fortuitum - M.peregrinum complex	No	NR	NR	NR	NR	NR	-	-	-	-	-	-	-	-	-	-	-	NR		-	-	-	NR	NR	NR
P1232		Yes	S	S	wt	wt	wt	-	-	-	-	-	-	-	-	-	-	-	nnnnnnnnnnnnnnnnnnnnnnooonnnnnnnoooonnnnnnn	L4.6.2/Cameroon/SIT61	61	CAM	Lineage_4_(Euro-American)	WT	WT	WT
P1233		Yes	S	S	wt	wt	wt	-	-	-	-	-	-	-	-	-	-	-	nnnnnnnnnnnnnnnnnnnnnnooonnnnnnnoooonnnnnnn	L4.6.2/Cameroon/SIT61	61	CAM	Lineage_4_(Euro-American)	WT	WT	WT
P1237		Yes	S	S	wt	wt	wt	-	-	-	-	-	-	-	-	-	-	-	nnnooooooooonnnnnonnnnnnnnnnnnnnoooonnnoooo	L4.1.1/X/SIT200	200	X3	Lineage_4_(Euro-American)	WT	WT	WT
P1239		Yes	S	S	wt	wt	wt	-	-	-	-	-	-	-	-	-	-	-	nnnnnnnnnnnnnnnnnnnnnnooonnnnnnnoooonnnnnnn	L4.6.2/Cameroon/SIT61	61	CAM	Lineage_4_(Euro-American)	NR	NR	NR
P1240		Yes	S	S	wt	wt	wt	-	-	-	-	-	-	-	-	-	-	-	nnnnnnnnnnnnnnnnnnnnnnooonnnnnnnoooonnnnnnn	L4.6.2/Cameroon/SIT61	61	CAM	Lineage_4_(Euro-American)	NR	NR	NR
P1241		Yes	S	S	wt	wt	wt	-	-	-	-	-	-	-	-	-	-	-	nnnnnnnnnnnnnnnnnnnnnnooonnnnnnnoooonnnnnnn	L4.6.2/Cameroon/SIT61	61	CAM	Lineage_4_(Euro-American)	WT	NR	NR
P1315	MAC	No	NR	NR	NR	NR	NR	-	-	-	-	-	-	-	-	-	-	-	NR		-	-	-	NR	NR	NR
P1337		Yes	S	S	wt	wt	wt	-	-	-	-	-	-	-	-	-	-	-	ND		-	-	-	ND	ND	ND
P1344		Yes	S	S	wt	wt	wt	-	-	-	-	-	-	-	-	-	-	-	nnnnnnnnnnnnnnnooooooooooooooooooooonnnonnn	L4/SIT1204	1204	-	Lineage_4_(Euro-American)	NR	NR	NR
P1350		Yes	R	S	wt	mut	wt	S	S	wt	wt	S	S	S	ND	wt	ND	ND	nnnnnnnnnnnnnnnnnnnnnnooonnnnnnnoooonnnnnnn	L4.6.2/Cameroon/SIT61	61	CAM	Lineage_4_(Euro-American)	NR	NR	NR
P1363		Yes	S	S	wt	wt	wt	-	-	-	-	-	-	-	-	-	-	-	ND		-	-	-	ND	ND	ND
P1370		Yes	S	S	wt	wt	wt	-	-	-	-	-	-	-	-	-	-	-	nnnnnnnnnnnnnnnnnnnnnnooonnnnnnnoooonnnnnnn	L4.6.2/Cameroon/SIT61	61	CAM	Lineage_4_(Euro-American)	WT	WT	WT
P1376		Yes	S	S	wt	wt	wt	-	-	-	-	-	-	-	-	-	-	-	nnnnnnnnnnnnnnnooooooooooooooooooooonnnonnn	L4/SIT1204	1204	-	Lineage_4_(Euro-American)	NR	NR	NR
P1406		Yes	S	S	wt	wt	wt	-	-	-	-	-	-	-	-	-	-	-	nnnnnnnnnnnnnnnnnnnnnnooonnnnnnnoooonnnnnnn	L4.6.2/Cameroon/SIT61	61	CAM	Lineage_4_(Euro-American)	WT	WT	WT
P1413		Yes	R	S	mut	mut	wt	S	S	wt	wt	S	S	S	ND	wt	ND	ND	nooooooooooooooonnnnnnooonnnnnnnoooonnnnnnn	L4.6.2/Cameroon/SIT852	852	CAM	Lineage_4_(Euro-American)	WT	315C	(-15)T
P1430		Yes	S	S	wt	wt	wt	-	-	-	-	-	-	-	-	-	-	-	nnnnnnnnnnnnnnnnnnnnnnooonnnnnnnoooonnnnnnn	L4.6.2/Cameroon/SIT61	61	CAM	Lineage_4_(Euro-American)	WT	WT	WT
P1457		Yes	S	S	wt	wt	wt	-	-	-	-	-	-	-	-	-	-	-	nnnnnnnnnnnnnnnnnnnnnnooonnnnnnnoooonnnnnnn	L4.6.2/Cameroon/SIT61	61	CAM	Lineage_4_(Euro-American)	NR	NR	NR
P1471		Yes	S	S	wt	wt	wt	-	-	-	-	-	-	-	-	-	-	-	nnnnnnnnnnnnnnnnnnnnnnnnooooooonoooonnnonnn	L4/T2/SIT316	316	H3	Lineage_4_(Euro-American)	WT	WT	WT
P1487		Yes	S	S	wt	wt	wt	-	-	-	-	-	-	-	-	-	-	-	nnnooooooooonnnnnonnnnnnnnnnnnnnoooonnnoooo	L4.1.1/X/SIT200	200	X3	Lineage_4_(Euro-American)	WT	WT	WT
P1489		Yes	S	S	wt	wt	wt	-	-	-	-	-	-	-	-	-	-	-	nnnnnnnnnnnnnnnnnnnnnnooonnnnnnnoooonnnnnnn	L4.6.2/Cameroon/SIT61	61	CAM	Lineage_4_(Euro-American)	WT	WT	WT
P1490	M.chelonae complex (group III, M.abscessus)	No	NR	NR	NR	NR	NR	-	-	-	-	-	-	-	-	-	-	-	NR		-	-	-	NR	NR	NR
P1503		Yes	S	S	wt	wt	wt	-	-	-	-	-	-	-	-	-	-	-	nnnnnnnnnnnnnnnnnnnnnnooonnnnnnnoooonnnnnnn	L4.6.2/Cameroon/SIT61	61	CAM	Lineage_4_(Euro-American)	WT	WT	WT
P1504		Yes	S	S	wt	wt	wt	-	-	-	-	-	-	-	-	-	-	-	nnnnnnnnnnnnnnnnnnnnnnooonnnnnnnoooonnnnnnn	L4.6.2/Cameroon/SIT61	61	CAM	Lineage_4_(Euro-American)	NR	NR	NR
P1552		Yes	S	S	wt	wt	wt	-	-	-	-	-	-	-	-	-	-	-	nnnnnnnnnnnnnnnnnnnnnnooonnnnnnnoooonnnnnnn	L4.6.2/Cameroon/SIT61	61	CAM	Lineage_4_(Euro-American)	NR	NR	NR
P1561		Yes	S	S	wt	wt	wt	-	-	-	-	-	-	-	-	-	-	-	nnnnnnnnnnnnnnnnnnnnnnooonnnnnnnoooonnnnnnn	L4.6.2/Cameroon/SIT61	61	CAM	Lineage_4_(Euro-American)	WT	WT	WT
P1571		Yes	S	S	wt	wt	wt	-	-	-	-	-	-	-	-	-	-	-	nnnnnnnnnnnnnnnnnnnnnnooonnnnnnnoooonnnnnnn	L4.6.2/Cameroon/SIT61	61	CAM	Lineage_4_(Euro-American)	WT	WT	WT
P1620		Yes	R	S	wt	mut	wt	S	S	wt	wt	NR	NR	NR	ND	NR	ND	ND	nnnnnnnnnnnnnnnoonnnnnooonnnnnnnoooonnnnnnn	L4/new	new	-	Lineage_4_(Euro-American)	WT	WT	(-15)T
P1644		Yes	S	S	wt	wt	wt	-	-	-	-	-	-	-	-	-	-	-	nnnnnnnnnnnnnnnnnnnnnnooonnnnnnnoooonnnnnnn	L4.6.2/Cameroon/SIT61	61	CAM	Lineage_4_(Euro-American)	NR	NR	NR
P1659		Yes	S	S	wt	wt	wt	-	-	-	-	-	-	-	-	-	-	-	nnnnnnnnnnnnnnnnnnnnnonnnnnnnnnnoooonnnonnn	L4/T2/SIT2088	2088	T2	Lineage_4_(Euro-American)	WT	WT	WT
P1667	NR	No	NR	NR	NR	NR	NR	-	-	-	-	-	-	-	-	-	-	-	nnnnnnnnnnnnnnnnnnnnnnooonnnnnnnoooonnnnnnn	L4.6.2/Cameroon/SIT61	61	CAM	Lineage_4_(Euro-American)	NR	NR	NR
P1668		Yes	R	S	wt	mut	wt	S	S	wt	wt	S	S	S	ND	wt	ND	ND	nnnnnnnnnnnnnnnnnnnnnnnnnnnnnnnnoooonnnnnnn	L4/T1/SIT53	53	T1	Lineage_4_(Euro-American)	NR	WT	(-15)T
P1685		Yes	S	S	wt	wt	wt	-	-	-	-	-	-	-	-	-	-	-	ND		-	-	-	ND	ND	ND
P1692		Yes	S	S	wt	wt	wt	-	-	-	-	-	-	-	-	-	-	-	ND		-	-	-	ND	ND	ND
P1725		Yes	S	S	wt	wt	wt	-	-	-	-	-	-	-	-	-	-	-	nnnnnnnnnnnnnnnnnnnnnnooonnnnnnnoooonnnnnnn	L4.6.2/Cameroon/SIT61	61	CAM	Lineage_4_(Euro-American)	WT	WT	WT
P1741		Yes	S	S	wt	wt	wt	-	-	-	-	-	-	-	-	-	-	-	ND		-	-	-	ND	ND	ND
P1761		Yes	R/S	S	wt	wt/mut	wt	S	S	wt	wt	S	S	S	ND	wt	ND	ND	nnnnnnnnnnnnnnnnnnnnnnooonnnnnnnoooonnnnnnn	L4.6.2/Cameroon/SIT61	61	CAM	Lineage_4_(Euro-American)	NR	NR	NR
P1789		Yes	S	S	wt	wt	wt	-	-	-	-	-	-	-	-	-	-	-	nnnnnnnnnnnnnnnnnnnnnnooonnnnnnnoooonnnnnnn	L4.6.2/Cameroon/SIT61	61	CAM	Lineage_4_(Euro-American)	WT	WT	WT
P1795		Yes	S	S	wt	wt	wt	-	-	-	-	-	-	-	-	-	-	-	ND		-	-	-	ND	ND	ND
P1798		Yes	S	S	wt	wt	wt	-	-	-	-	-	-	-	-	-	-	-	nnnnnnnnnnnnnnnnnnnnnnooonnnnnnnoooonnnnnnn	L4.6.2/Cameroon/SIT61	61	CAM	Lineage_4_(Euro-American)	WT	WT	WT
P1805		Yes	S	S	wt	wt	wt	-	-	-	-	-	-	-	-	-	-	-	NR		-	-	-	WT	WT	WT
P1826		Yes	S	S	wt	wt	wt	-	-	-	-	-	-	-	-	-	-	-	nnnnnnnnnnnnnnnnnnnnnnooonnnnnnnoooonnnnnnn	L4.6.2/Cameroon/SIT61	61	CAM	Lineage_4_(Euro-American)	WT	WT	WT
P1842		Yes	S	S	wt	wt	wt	-	-	-	-	-	-	-	-	-	-	-	nnnnnnnnnnnnnnnnnnnnnnnnooooooonoooonnnonnn	L4/T2/SIT316	316	H3	Lineage_4_(Euro-American)	WT	WT	WT
P1850		Yes	R	S	mut	wt	wt	S	S	wt	wt	S	S	S	ND	wt	ND	ND	nnnnnnnnnnnnnnnnnnnnnnooonnnnnnnoooonnnnnnn	L4.6.2/Cameroon/SIT61	61	CAM	Lineage_4_(Euro-American)	NR	NR	NR
P1869		Yes	S	S	wt	wt	wt	-	-	-	-	-	-	-	-	-	-	-	ND		-	-	-	ND	ND	ND
P1884		Yes	S	S	wt	wt	wt	-	-	-	-	-	-	-	-	-	-	-	nnnnnnnnnnnnnnnnnnnnnnooonnnnnnnoooonnnnnnn	L4.6.2/Cameroon/SIT61	61	CAM	Lineage_4_(Euro-American)	WT	WT	WT
P1920		Yes	S	S	wt	wt	wt	-	-	-	-	-	-	-	-	-	-	-	ND		-	-	-	ND	ND	ND
P1938		Yes	S	S	wt	wt	wt	-	-	-	-	-	-	-	-	-	-	-	nnonnnnooooooonnnnnnoooonnnnnnnnoooonnnnnnn	L4.3.2/LAM3/SIT2428	2428	LAM3	Lineage_4_(Euro-American)	WT	WT	WT
P1945		Yes	S	S	wt	wt	wt	-	-	-	-	-	-	-	-	-	-	-	nnnnnnnnnnnnnnnoooonnnooonnnnnnnoooonnnnonn	L4/NEW2	NEW2	-	Lineage_4_(Euro-American)	NR	NR	NR
P1951 (1)		Yes	S	R	wt	wt	531mut	S	S	wt	wt	S	S	S	ND	wt	ND	ND	nnnnnnnnnnnnnnnnnnnnnnooonnnnnnnoooonnnnnnn	L4.6.2/Cameroon/SIT61	61	CAM	Lineage_4_(Euro-American)	NR	NR	NR
P1951 (2)	M.avium, M.paratuberculosis, M.silvaticum	No	NR	NR	NR	NR	NR	-	-	-	-	-	-	-	-	-	-	-	NR		-	-	-	NR	NR	NR
P1954		Yes	R	S	wt	mut	wt	S	NR	wt	NR	S	S	S	ND	wt	ND	ND	ND		-	-	-	ND	ND	ND
P1956		Yes	S	S	wt	wt	wt	-	-	-	-	-	-	-	-	-	-	-	nnonnnnnnnnnnnnnoonnnnnooooooonnoooonnnonnn	L4/NEW3	NEW3	-	Lineage_4_(Euro-American)	NR	NR	NR
P1963		Yes	S	S	wt	wt	wt	-	-	-	-	-	-	-	-	-	-	-	nnnnnnnooooonnnnnnnnooooonoooooooooooonnnnn	L5/afri/WA1/new	new	-	Lineage_5_(West_African_1_-_Afri2)	WT	WT	WT
P1976		Yes	S	S	wt	wt	wt	-	-	-	-	-	-	-	-	-	-	-	nnnnnnnnnnnnnnnnnnnnnnooonnnnnnnoooonnnnnnn	L4.6.2/Cameroon/SIT61	61	CAM	Lineage_4_(Euro-American)	WT	WT	WT
P1996		Yes	S	S	wt	wt	wt	-	-	-	-	-	-	-	-	-	-	-	ND		-	-	-	ND	ND	ND
P2000		Yes	S	S	wt	wt	wt	-	-	-	-	-	-	-	-	-	-	-	nnnnnnnnnnnnnnnnnnnnnnooonnnnnnnoooonnnnnnn	L4.6.2/Cameroon/SIT61	61	CAM	Lineage_4_(Euro-American)	NR	NR	NR
P2003		Yes	S	S	wt	wt	wt	-	-	-	-	-	-	-	-	-	-	-	nnnnnonnnnnnnnnnnnnnnnnnooooooonoooonnnonnn	L4/NEW1	NEW1	-	Lineage_4_(Euro-American)	WT	WT	WT
P2005		Yes	S	S	wt	wt	wt	-	-	-	-	-	-	-	-	-	-	-	nnnnnnnnnnnnnnnnnnnnnnooonnnnnnnoooonnnnnnn	L4.6.2/Cameroon/SIT61	61	CAM	Lineage_4_(Euro-American)	WT	WT	WT
P2011	Myc genus	No	NR	NR	NR	NR	NR	-	-	-	-	-	-	-	-	-	-	-	NR		-	-	-	NR	NR	NR
P2027		Yes	S	S	wt	wt	wt	-	-	-	-	-	-	-	-	-	-	-	nnnnnnnnnnnnnnnnnnnnnnooonnnnnnnoooonnnnnnn	L4.6.2/Cameroon/SIT61	61	CAM	Lineage_4_(Euro-American)	WT	WT	WT
P2030		Yes	S	S	wt	wt	wt	-	-	-	-	-	-	-	-	-	-	-	nnnnnnnnnnnnnnnnnnnnnnooonnnnnnnoooonnnnnnn	L4.6.2/Cameroon/SIT61	61	CAM	Lineage_4_(Euro-American)	NR	WT	WT
P2036		Yes	S	S	wt	wt	wt	-	-	-	-	-	-	-	-	-	-	-	nnnnnnnnnnnnnnnnnnnnnnooonnnnnnnoooonnnnnnn	L4.6.2/Cameroon/SIT61	61	CAM	Lineage_4_(Euro-American)	WT	NR	NR
P2037		Yes	S	S	wt	wt	wt	-	-	-	-	-	-	-	-	-	-	-	nnnnnnnnnnnnnnnnnnnnnnooonnnnnnnoooonnnnnnn	L4.6.2/Cameroon/SIT61	61	CAM	Lineage_4_(Euro-American)	WT	WT	WT
P2040		Yes	S	S	wt	wt	wt	-	-	-	-	-	-	-	-	-	-	-	nnnnnnnnnnnnnnnnnnnnnnooonnnnnnnoooonnnnnnn	L4.6.2/Cameroon/SIT61	61	CAM	Lineage_4_(Euro-American)	NR	NR	NR
P2063		Yes	S	S	wt	wt	wt	-	-	-	-	-	-	-	-	-	-	-	nnnnnnnooooonnnnnnnnooooonoooooooooooooonnn	L5/afri/WA1/SIT1592	1592	-	Lineage_5_(West_African_1_-_Afri2)	NR	NR	NR
P2086		Yes	S	S	wt	wt	wt	-	-	-	-	-	-	-	-	-	-	-	nnnnnnnnnnnnnnnnnnnnnnooonnnnnonoooonnnnnnn	L4/new	new	-	Lineage_4_(Euro-American)	NR	NR	NR
P2092		Yes	S	S	wt	wt	wt	-	-	-	-	-	-	-	-	-	-	-	nnnooooooooonnnnnonnnnnnnnnnnnnnoooonnnoooo	L4.1.1/X/SIT200	200	X3	Lineage_4_(Euro-American)	WT	WT	WT
P2098		Yes	S	S	wt	wt	wt	-	-	-	-	-	-	-	-	-	-	-	nnnnnnnnnnnnnnnnnnnnnnooonnnnnnnoooonnnnnnn	L4.6.2/Cameroon/SIT61	61	CAM	Lineage_4_(Euro-American)	WT	WT	WT
P2105		Yes	S	S	wt	wt	wt	-	-	-	-	-	-	-	-	-	-	-	nnnnnnoooooooooonnnnoooonnnnnnnnnnnnooonnnn	L5/afri/WA1/orphan	ORPHAN	AFRI	Lineage_5_(West_African_1_-_Afri2)	NR	NR	NR
P2113		Yes	S	S	wt	wt	wt	-	-	-	-	-	-	-	-	-	-	-	nnnnnnoooooooooonnnnoooonnnnnnnnnnnnooonnnn	L5/afri/WA1/orphan	ORPHAN	AFRI	Lineage_5_(West_African_1_-_Afri2)	NR	NR	NR
P2115		Yes	S	S	wt	wt	wt	-	-	-	-	-	-	-	-	-	-	-	nnnnnnnoooooooooooooooooooooooooooonooonnnn	L5/afri/WA1/new	new	-	Lineage_5_(West_African_1_-_Afri2)	WT	WT	WT
P2131		Yes	S	S	wt	wt	wt	-	-	-	-	-	-	-	-	-	-	-	nooooooooooooooonnnnnnooonnnnnnnoooonnnnnnn	L4.6.2/Cameroon/SIT852	852	CAM	Lineage_4_(Euro-American)	WT	WT	WT
P2136		Yes	S	S	wt	wt	wt	-	-	-	-	-	-	-	-	-	-	-	nnnnnnnnnnnnnnnnnnnnnnooonnnnnnnoooonnnnnnn	L4.6.2/Cameroon/SIT61	61	CAM	Lineage_4_(Euro-American)	WT	WT	WT
P2141		Yes	S	S	wt	wt	wt	-	-	-	-	-	-	-	-	-	-	-	nnnnnnnnnnnnnnnnnnnnnnooonnnnnnnoooonnnnnnn	L4.6.2/Cameroon/SIT61	61	CAM	Lineage_4_(Euro-American)	NR	NR	NR
P2144		Yes	S	R	wt	wt	531mut	R/S	R	A90A/V,D94D/V	mut	S	S	S	ND	wt	ND	ND	nnnnnnoooooooooonnnnoooonnnnnnnnnnnnooonnnn	L5/afri/WA1/orphan	ORPHAN	AFRI	Lineage_5_(West_African_1_-_Afri2)	NR	NR	NR
P2164		Yes	S	S	wt	wt	wt	-	-	-	-	-	-	-	-	-	-	-	nnnnnnnnnnnnnnnnnnnnnnooonnnnnnnoooonnnnnnn	L4.6.2/Cameroon/SIT61	61	CAM	Lineage_4_(Euro-American)	NR	NR	NR
P2187		Yes	S	S	wt	wt	wt	-	-	-	-	-	-	-	-	-	-	-	nooooooooooooooonnnnnnooonnnnnnnoooonnnnnnn	L4.6.2/Cameroon/SIT852	852	CAM	Lineage_4_(Euro-American)	NR	NR	NR
P2201		Yes	S	S	wt	wt	wt	-	-	-	-	-	-	-	-	-	-	-	nnnnnnnnnnnnnnnnnnnnnnooonnnnnnnoooonnnnnnn	L4.6.2/Cameroon/SIT61	61	CAM	Lineage_4_(Euro-American)	WT	WT	WT
P2208		Yes	S	S	wt	wt	wt	-	-	-	-	-	-	-	-	-	-	-	nnnnnnnnnnnnnnnnnnnnnnooonnnnnnnoooonnnnnnn	L4.6.2/Cameroon/SIT61	61	CAM	Lineage_4_(Euro-American)	NR	NR	NR
P2210		Yes	S	S	wt	wt	wt	-	-	-	-	-	-	-	-	-	-	-	nnnnnonnnnnnnnnnnnnnnnnnooooooonoooonnnonnn	L4/NEW1	NEW1	-	Lineage_4_(Euro-American)	WT	WT	WT
P2211		Yes	S	S	wt	wt	wt	-	-	-	-	-	-	-	-	-	-	-	ND		-	-	-	ND	ND	ND
P2213		Yes	S	S	wt	wt	wt	-	-	-	-	-	-	-	-	-	-	-	ND		-	-	-	ND	ND	ND
P2215		Yes	S	S	wt	wt	wt	-	-	-	-	-	-	-	-	-	-	-	nnnnnnnnnnnnnnnoooonnnooonnnnnnnoooonnnnonn	L4/NEW2	NEW2	-	Lineage_4_(Euro-American)	WT	WT	WT
P2216		Yes	R	R	mut	wt	516mut	S	S	wt	wt	S	S	S	ND	wt	ND	ND	nnnnnnnnnnnnnnnnnnnnnnooonnnnnnnoooonnnnnnn	L4.6.2/Cameroon/SIT61	61	CAM	Lineage_4_(Euro-American)	516GTC	315C	WT
P2223		Yes	S	S	wt	wt	wt	-	-	-	-	-	-	-	-	-	-	-	nnnnnnnnnnnnnnnnnnnnnnooonnnnnnnoooonnnonnn	L4.6.2/Cameroon/SIT403	403	CAM	Lineage_4_(Euro-American)	NR	NR	NR
P2225		Yes	S	S	wt	wt	wt	-	-	-	-	-	-	-	-	-	-	-	nnnnnnnnnnnnnnnnnnnnnnooonnnnnnnoooonnnnnnn	L4.6.2/Cameroon/SIT61	61	CAM	Lineage_4_(Euro-American)	NR	WT	WT
P2230		Yes	S	S	wt	wt	wt	-	-	-	-	-	-	-	-	-	-	-	nnnnnnnooooonnnnnnnnnnnnonooooooonnnooonnnn	L5/afri/WA1/new	new	-	Lineage_5_(West_African_1_-_Afri2)	WT	WT	WT
P2242		Yes	S	S	wt	wt	wt	-	-	-	-	-	-	-	-	-	-	-	nnnnnnnnnnnnnnnnnnnnnnooonnnnnnnoooonnnnnnn	L4.6.2/Cameroon/SIT61	61	CAM	Lineage_4_(Euro-American)	WT	WT	WT
P2243		Yes	S	S	wt	wt	wt	-	-	-	-	-	-	-	-	-	-	-	nnnnnnnnnnnnnnnnnnnnnnooonnnnnnnoooonnnnnnn	L4.6.2/Cameroon/SIT61	61	CAM	Lineage_4_(Euro-American)	WT	WT	WT
P2245		Yes	S	S	wt	wt	wt	-	-	-	-	-	-	-	-	-	-	-	nnnnnnnnnnnnnnnnnnnnnnooonnnnnnnoooonnnnnnn	L4.6.2/Cameroon/SIT61	61	CAM	Lineage_4_(Euro-American)	NR	NR	NR
P2259		Yes	S	S	wt	wt	wt	-	-	-	-	-	-	-	-	-	-	-	nnnnnnnnnnnnnnnnnnnnnnooonnnnnnnoooonnnnnnn	L4.6.2/Cameroon/SIT61	61	CAM	Lineage_4_(Euro-American)	NR	NR	NR
P2261		Yes	S	S	wt	wt	wt	-	-	-	-	-	-	-	-	-	-	-	nnnnnnnnnnnnnnnnnnnnnnooonnnnnnnoooonnnnnnn	L4.6.2/Cameroon/SIT61	61	CAM	Lineage_4_(Euro-American)	NR	NR	NR
P2265		Yes	S	S	wt	wt	wt	-	-	-	-	-	-	-	-	-	-	-	nnnnnnnnnnnnnnnnnnnnnnooonnnnnnnoooonnnnnnn	L4.6.2/Cameroon/SIT61	61	CAM	Lineage_4_(Euro-American)	NR	NR	NR
P2267		Yes	S	R	wt	wt	531mut	S	S	wt	wt	S	S	S	ND	wt	ND	ND	nnnnnnnnnnnnnnnnnnnnnnooonnnnnnnoooonnnnnnn	L4.6.2/Cameroon/SIT61	61	CAM	Lineage_4_(Euro-American)	531TTG	WT	WT
P2276		Yes	S	S	wt	wt	wt	-	-	-	-	-	-	-	-	-	-	-	nnnnnonnnnnnnnnnnnnnnnooonnnnnnnoooonnnnnnn	L4/new	new	-	Lineage_4_(Euro-American)	WT	WT	WT
P2277		Yes	R	S	wt	mut	wt	S	S	wt	wt	S	S	S	ND	wt	ND	ND	nnnnnnnnnnnnnnnnnnnnnnooonnnnnnnoooonnnnnnn	L4.6.2/Cameroon/SIT61	61	CAM	Lineage_4_(Euro-American)	NR	NR	NR
P2285		Yes	S	S	wt	wt	wt	-	-	-	-	-	-	-	-	-	-	-	nooooooooooooooonnnnnnooonnnnnnnoooonnnnnnn	L4.6.2/Cameroon/SIT852	852	CAM	Lineage_4_(Euro-American)	WT	WT	WT
P2312		Yes	S	S	wt	wt	wt	-	-	-	-	-	-	-	-	-	-	-	nnnnnnnnnnnnnnnnnnnnnnooonnnnnnnoooonnnnnnn	L4.6.2/Cameroon/SIT61	61	CAM	Lineage_4_(Euro-American)	WT	WT	WT
P2315		Yes	S	S	wt	wt	wt	-	-	-	-	-	-	-	-	-	-	-	nnnnnnnnnnnnnnnnnnnnnnoonnnnnnnnoooonnnnnnn	L4/T1/SIT1580	1580	T1	Lineage_4_(Euro-American)	WT	WT	WT
P623		Yes	S	S	wt	wt	wt	-	-	-	-	-	-	-	-	-	-	-	ND		-	-	-	ND	ND	ND
P709	M.intracellulare (sequevars Min-A, -B, -C and -D)	No	NR	NR	NR	NR	NR	-	-	-	-	-	-	-	-	-	-	-	NR		-	-	-	NR	NR	NR
P711		Yes	S	S	wt	wt	wt	-	-	-	-	-	-	-	-	-	-	-	nnnnnnnnnnnnnnnnnnnnnnooonnnnnnnoooonnnnnnn	L4.6.2/Cameroon/SIT61	61	CAM	Lineage_4_(Euro-American)	NR	WT	WT
P730		Yes	S	S	wt	wt	wt	-	-	-	-	-	-	-	-	-	-	-	nnnnnnnnnnnnnnnnnnnnnnooonnnnnnnoooonnnnnnn	L4.6.2/Cameroon/SIT61	61	CAM	Lineage_4_(Euro-American)	NR	NR	NR
P762		Yes	S	R	wt	wt	526mut	S	S	wt	wt	S	S	S	ND	wt	ND	ND	oooooooooooooooooooooooooooooooooooonnnnnnn	L2/Beijing/SIT269	269	Beijing	Lineage_2_(East_Asia_-_Beijing)	526GAC	WT	WT
P775		Yes	S	S	wt	wt	wt	-	-	-	-	-	-	-	-	-	-	-	nnnnnnnnnnnnnnnnnnnnnnooonnnnnnnoooonnnnnnn	L4.6.2/Cameroon/SIT61	61	CAM	Lineage_4_(Euro-American)	NR	NR	NR
P780		Yes	S	R	wt	wt	526mut	S	S	wt	wt	S	S	S	ND	wt	ND	ND	oooooooooooooooooooooooooooooooooooonnnnnnn	L2/Beijing/SIT269	269	Beijing	Lineage_2_(East_Asia_-_Beijing)	526GAC	WT	WT
P805		Yes	S	S	wt	wt	wt	-	-	-	-	-	-	-	-	-	-	-	nnnonnnnnnnnnnnnnnnnnnnnnnnnnnnnoooonnnonnn	L4/T2/SIT848	848	T2	Lineage_4_(Euro-American)	WT	WT	WT
P814		Yes	S	S	wt	wt	wt	-	-	-	-	-	-	-	-	-	-	-	ND		-	-	-	ND	ND	ND
P819		Yes	R	S	wt	mut	wt	S	S	wt	wt	S	S	S	ND	wt	ND	ND	nnnnnnnnnnnnnnnnnnnnnnooonnnnnnnoooonnnnnnn	L4.6.2/Cameroon/SIT61	61	CAM	Lineage_4_(Euro-American)	WT	WT	(-15)T
P829	NR	No	NR	NR	NR	NR	NR	-	-	-	-	-	-	-	-	-	-	-	NR		-	-	-	NR	NR	NR
P833		Yes	S	S	wt	wt	wt	-	-	-	-	-	-	-	-	-	-	-	nnonnnnnnnnnnnnnnnnnnnooonnnnnnnoooonnnnnnn	L4/new	new	-	Lineage_4_(Euro-American)	WT	WT	WT
P864		Yes	S	S	wt	wt	wt	-	-	-	-	-	-	-	-	-	-	-	nnnnnnoooooooooononnoooonnnnnnnnonnnooonnnn	L5/afri/WA1/new	new	-	Lineage_5_(West_African_1_-_Afri2)	WT	WT	WT
P865		Yes	S	S	wt	wt	wt	-	-	-	-	-	-	-	-	-	-	-	ND		-	-	-	ND	ND	ND
P873		Yes	R	S	mut	wt	wt	S	S	wt	wt	S	S	S	ND	wt	ND	ND	nnnnnnnnnnnnnnnnnnnnnnooonnnnnnnoooonnnnnnn	L4.6.2/Cameroon/SIT61	61	CAM	Lineage_4_(Euro-American)	WT	315C	WT
P875		Yes	S	S	wt	wt	wt	-	-	-	-	-	-	-	-	-	-	-	nnnnnnnnnnnnnnnnnnnnnnooonnnnnnnoooonnnnnnn	L4.6.2/Cameroon/SIT61	61	CAM	Lineage_4_(Euro-American)	WT	WT	WT
P877		Yes	S	S	wt	wt	wt	-	-	-	-	-	-	-	-	-	-	-	nnnnnnnnnnnnnnnnnnnnnnooonnnnnnnoooonnnnnnn	L4.6.2/Cameroon/SIT61	61	CAM	Lineage_4_(Euro-American)	NR	NR	NR
P899		Yes	R	R	mut	wt	526mut	S	S	wt	wt	S	S	S	ND	wt	ND	ND	nnnnnnnnnnnnnnnnnnnnnnooonnnnnnnoooonnnnonn	L4.6.2/Cameroon/SIT838	833	CAM	Lineage_4_(Euro-American)	NR	NR	NR
P901		Yes	S	S	wt	wt	wt	-	-	-	-	-	-	-	-	-	-	-	nnonnnnnnnnnnnnnoonnnnnooooooonnoooonnnonnn	L4/NEW3	NEW3	-	Lineage_4_(Euro-American)	WT	WT	WT
P902		Yes	S	S	wt	wt	wt	-	-	-	-	-	-	-	-	-	-	-	nnnnnnnnnnnnnnnnnnnnnnooonnnnnnnoooonnnnnnn	L4.6.2/Cameroon/SIT61	61	CAM	Lineage_4_(Euro-American)	WT	WT	WT
P915	NR	No	NR	NR	NR	NR	NR	-	-	-	-	-	-	-	-	-	-	-	NR		-	-	-	NR	NR	NR
P917		Yes	S	S	wt	wt	wt	-	-	-	-	-	-	-	-	-	-	-	nnonnnnnnnnnnnnnoonnnnnooooooonnoooonnnonnn	L4/NEW3	NEW3	-	Lineage_4_(Euro-American)	WT	WT	WT
P961		Yes	S	S	wt	wt	wt	-	-	-	-	-	-	-	-	-	-	-	nnnnnnnnnnnnnnnnnnnnnnooonnnnnnnoooonnnnnnn	L4.6.2/Cameroon/SIT61	61	CAM	Lineage_4_(Euro-American)	NR	NR	NR
P967	M.intracellulare (sequevars Min-A, -B, -C and -D)	No	NR	NR	NR	NR	NR	-	-	-	-	-	-	-	-	-	-	-	NR		-	-	-	NR	NR	NR
P969		Yes	S	S	wt	wt	wt	-	-	-	-	-	-	-	-	-	-	-	nnnnnnnnnnnnnnnnnnnnnnooonnnnnnnoooonnnnnnn	L4.6.2/Cameroon/SIT61	61	CAM	Lineage_4_(Euro-American)	WT	WT	WT
P986		Yes	S	S	wt	wt	wt	-	-	-	-	-	-	-	-	-	-	-	ND		-	-	-	ND	ND	ND

## Sheet: Tablas din
	Valid	(Varios elementos)		Valid	(Varios elementos)		Valid	(Varios elementos)
	Etiquetas de fila	Cuenta de rpoB2		Etiquetas de fila	Cuenta de katG2		Etiquetas de fila	Cuenta de inhA2
	516GTC	1		315C	4		(-15)T	7
	526GAC	2		ND	23		ND	23
	531TTG	2		NR	67		NR	67
	ND	23		WT	108		WT	105
	NR	70		Total general	202		Total general	202
	WT	104
	Total general	202

## Sheet: Hoja1
Supplementary File : full results (drug-sensitivity testing performed by line probe assay or pyrosequencing: columns C to S, genotyping: columns T to X, predicitive drug-sensitivity testing using TB-RINT: columns Y to AA )
AID TB Resistance											Microbead-based resistance			Spoligotyping
RIF	INH	rpoB	katG	inhA	FLQ	EMB	SLID	gyrA	embB 306	rrs	rpoB	katG 315	inhA	Lineage/SIT
R	R	531 mut	mut	wt	S	S	S	wt	wt	wt	531TTG	315C	wt	L4.6.2/Cameroon/SIT852
R	R	531 mut	mut	wt	S	S	S	wt	wt	wt	NP	NP	NP	NP
R	R	526 mut	wt Ø	wt	S	R	S	wt	ATC	wt	NR	NR	NR	L4.6.2/Cameroon/SIT852
R	R	526 mut	mut	wt	S	S	S	wt	wt	wt	NR	NR	NR	L4.6.2/Cameroon/SIT833
R	R	516 mut	mut	wt	S	S	S	wt	wt	wt	516GTC	315C	wt	L4.6.2/Cameroon/SIT61
R	S	531 mut	wt	wt	R/S	R	S	A90A/V,D94D/V	mut	wt	NR	NR	NR	L5/afri/WA1/orphan
R	S	531 mut	wt	wt	R	R	S	A90V	ATC	wt	NP	NP	NP	NP
R	S	531 mut	wt	wt	S	S	S	wt	wt	wt	531TTG	wt	wt	L4.6.2/Cameroon/SIT61
R	S	531 mut	wt	wt	S	S	S	wt	wt	wt	NR	NR	NR	L4.6.2/Cameroon/SIT61
R	S	526 mut	wt	wt	S	S	S	wt	wt	wt	526GAC	wt	wt	L2/Beijing/SIT269
R	S	526 mut	wt	wt	S	S	S	wt	wt	wt	526GAC	wt	wt	L2/Beijing/SIT269
R	S	526 mut	wt	wt	S	S	S	wt	wt	wt	NR	NR	NR	L4/T1/orphan
R	S	526 mut	wt	wt	S	S	S	wt	wt	wt	NP	NP	NP	NP
R	S	526 mut	wt	wt	S	S	S	wt	wt	wt	NP	NP	NP	NP
S	R	wt	mut	mut	S	S	S	wt	wt	wt	wt	315C	(-15)T	L4.6.2/Cameroon/SIT852
S	R	wt	mut	wt	S	S	S	wt	wt	wt	wt	315C	wt	L4.6.2/Cameroon/SIT61
S	R	wt	mut	wt	S	S	S	wt	wt	wt	NR	NR	NR	L4.6.2/Cameroon/SIT61
S	R	wt	wt	mut	S	S	S	wt	wt	wt	wt	wt	(-15)T	L4.6.2/Cameroon/SIT61
S	R	wt	wt	mut	S	S	S	wt	wt	wt	wt	wt	(-15)T	L4.6.2/Cameroon/SIT61
S	R	wt	wt	mut	S	S	S	wt	wt	wt	wt	wt	(-15)T	L4.6.2/Cameroon/SIT61
S	R	wt	wt	mut	S	S	S	wt	wt	wt	wt	wt	(-15)T	L4/T1/SIT53
S	R	wt	wt	mut	S	S	S	wt	wt	wt	NR	wt	(-15)T	L4/T1/SIT53
S	R	wt	wt	mut	S	S	S	wt	wt	wt	NR	NR	NR	L4.6.2/Cameroon/SIT61
S	R	wt	wt	mut	S	S	S	wt	wt	wt	NR	NR	NR	L4.6.2/Cameroon/SIT61
S	R	wt	wt	mut	S	NR	S	wt	NR	wt	NP	NP	NP	NP
S	R	wt	wt	mut	S	S	NR	wt	wt	NR	wt	wt	(-15)T	L4/new
S	R/S	wt	wt	wt/mut	S	S	S	wt	wt	wt	NR	NR	NR	L4.6.2/Cameroon/SIT61
S	R	wt	wt	wt Ø	S	S	S	wt	wt	wt	NR	NR	NR	L4/T2/SIT316
S	R	wt	wt	wt Ø	S	S	S	wt	wt	wt	NR	NR	NR	NR
